# Supplementary material for: A pre-screening strategy to assess resected tumor margins by imaging cytoplasmic viscosity and hypoxia
Source: eLife. 2021 Oct 11;10:e70471. doi: 10.7554/eLife.70471 (PMC8553343; doi:10.7554/eLife.70471)
Supplement: Supplementary file 1. [file elife-70471-supp1.docx]

**A Pre-Scree****ning Strategy to Assess Resected Tumor Margins by** **Imaging Cytoplasmic Viscosity and Hypoxia**

Hui Huang a,b, Youpei Lin c,Wenrui Ma d, Jiannan Liu e, Jing Han e, Xiaoyi Hu f, Meilin Tang a, Shiqiang Yan a,b, Mieradilijiang Abudupataer d, Chenping Zhang e, Qiang Gao c, Weijia Zhang a,b,d,*

a Institutes of Biomedical Sciences and The State Key Laboratory of Molecular Engineering of Polymers, Fudan University, Shanghai 200032, China

b Department of Systems Biology for Medicine and The Shanghai Key Laboratory of Medical Imaging Computing and Computer Assisted Intervention, Shanghai Medical College of Fudan University, Shanghai 200032, China

c Department of Liver Surgery and Transplantation, Liver Cancer Institute, Zhongshan Hospital, Fudan University, Shanghai 200032, China

d Department of Cardiac Surgery and Shanghai Institute of Cardiovascular Diseases, Zhongshan Hospital, Fudan University, Shanghai 200032, China

e Department of Oromaxillofacial Head and Neck Oncology, Shanghai Ninth People’s Hospital, Shanghai Jiao Tong University School of Medicine, Shanghai 200011, China

f Department of Urology, Zhongshan Hospital, Fudan University, Shanghai 200032, China

*Correspondence: [weijiazhang@fudan.edu.cn](mailto:weijiazhang@fudan.edu.cn) (Weijia Zhang)

**Supplementary File 1.** Clinical Characteristics of the patients

| **Cancer types** | **Hepatocellular cancer** | **Renal cancer** | **Oral cancer** | **Lung cancer** |
| --- | --- | --- | --- | --- |
| **N** | 9 | 6 | 5 | 5 |
| **Gender(%, male)** | 7 (77.8%) | 2 (33.3%) | 4 (80.0%) | 3 (60.0%) |
| **Age, average** | 49.7±9.2 | 58.0±13.3 | 67.8±7.5 | 65.8±8.1 |
